# Supplementary material for: Less Severe Sepsis in Cecal Ligation and Puncture Models with and without Lipopolysaccharide in Mice with Conditional Ezh2-Deleted Macrophages (LysM-Cre System)
Source: MDPI journal article supplement (doi:10.3390/ijms24108517), 2023-05-10
Supplement: s1 [file s1]

# Less Severe Sepsis in Cecal Ligation and Puncture Models with and without Lipopolysaccharide in Mice with Conditional *Ezh2*-Deleted Macrophages (LysM-Cre System)

**Supplement Table S1.** The unique proteins from cell lysate (proteome) that presented only in LPS-activated *Ezh2* null macrophages

| Pasted#  | Symbol   | Chr* | Position (Mbp) | Description                                                                                                                                      |
|----------|----------|------|----------------|--------------------------------------------------------------------------------------------------------------------------------------------------|
| ADK      | Adk      | 14   | 21.10264       | adenosine kinase [Source:MGI Symbol;Acc:MGI:87930]<br>allograft inflammatory factor 1 [Source:MGI Symbol;Acc:MGI:1343098]                        |
| AIF1     | Aif1     | 17   | 35.38997       | ankyrin repeat domain 13a [Source:MGI Symbol;Acc:MGI:1915670]                                                                                    |
| ANKRD13A | Ankrd13a | 5    | 114.9127       | chemokine (C-C motif) ligand 4 [Source:MGI Symbol;Acc:MGI:98261]                                                                                 |
| CCL4     | Ccl4     | 11   | 83.55341       | CD14 antigen [Source:MGI Symbol;Acc:MGI:88318]                                                                                                   |
| CD14     | Cd14     | 18   | 36.85812       | CD40 antigen [Source:MGI Symbol;Acc:MGI:88336]                                                                                                   |
| CD40     | Cd40     | 2    | 164.8975       | cytidine monophosphate (UMP-CMP) kinase 2, mitochondrial [Source:MGI Symbol;Acc:MGI:99830]                                                       |
| CMPK2    | Cmpk2    | 12   | 26.5192        | deltex 3-like, E3 ubiquitin ligase [Source:MGI Symbol;Acc:MGI:2656973]                                                                           |
| DTX3L    | Dtx3l    | 16   | 35.74688       | coagulation factor XIII, A1 subunit [Source:MGI Symbol;Acc:MGI:1921395]                                                                          |
| F13A1    | F13a1    | 13   | 37.05115       | hemopoietic cell kinase [Source:MGI Symbol;Acc:MGI:96052]                                                                                        |
| HCK      | Hck      | 2    | 152.9504       | microtubule-associated protein, RP/EB family, member 1 [Source:MGI Symbol;Acc:MGI:891995]                                                        |
| MAPRE1   | Mapre1   | 2    | 153.5832       | MARCKS-like 1 [Source:MGI Symbol;Acc:MGI:97143]                                                                                                  |
| MARCKSL1 | Marcksl1 | 4    | 129.4074       | N-acetylneuraminate pyruvate lyase [Source:MGI Symbol;Acc:MGI:1921341]                                                                           |
| NPL      | Npl      | 1    | 153.3788       | neuropilin 2 [Source:MGI Symbol;Acc:MGI:1100492]                                                                                                 |
| NRP2     | Nrp2     | 1    | 62.74244       | poly (ADP-ribose) polymerase family, member 14 [Source:MGI Symbol;Acc:MGI:1919489]                                                               |
| PARP14   | Parp14   | 16   | 35.65324       | pterin 4 alpha carbinolamine dehydratase/dimerization cofactor of hepatocyte nuclear factor 1 alpha (TCF1) 2 [Source:MGI Symbol;Acc:MGI:1919812] |
| PCBD2    | Pcbd2    | 13   | 55.87518       | protein (peptidyl-prolyl cis/trans isomerase) NIMA-interacting 1 [Source:MGI Symbol;Acc:MGI:1346036]                                             |
| PIN1     | Pin1     | 9    | 20.56339       | protein kinase N1 [Source:MGI Symbol;Acc:MGI:108022]                                                                                             |
| PKN1     | Pkn1     | 8    | 84.39317       | prostaglandin-endoperoxide synthase 2 [Source:MGI Symbol;Acc:MGI:97798]                                                                          |
| PTGS2    | Ptgs2    | 1    | 149.9758       | RAP2C, member of RAS oncogene family [Source:MGI Symbol;Acc:MGI:1919315]                                                                         |
| RAP2C    | Rap2c    |      | 50.09279       | ribosomal protein L23 [Source:MGI Symbol;Acc:MGI:1929455]                                                                                        |
| RPL23    | Rpl23    | 11   | 97.66835       | radical S-adenosyl methionine domain containing 2 [Source:MGI Symbol;Acc:MGI:1929628]                                                            |
| RSAD2    | Rsad2    | 12   | 26.49275       | scaffold attachment factor B [Source:MGI Symbol;Acc:MGI:2146974]                                                                                 |
| SAFB     | Safb     | 17   | 56.89183       | schlafen 5 [Source:MGI Symbol;Acc:MGI:1329004]                                                                                                   |
| SLFN5    | Slfn5    | 11   | 82.84218       | steroid receptor RNA activator 1 [Source:MGI Symbol;Acc:MGI:1344414]                                                                             |
| SRA1     | Sra1     | 18   | 36.79973       | translocase of inner mitochondrial membrane 10 [Source:MGI Symbol;Acc:MGI:1353429]                                                               |
| TIMM10   | Timm10   | 2    | 84.65734       |                                                                                                                                                  |

|         |         |    |          |                                                                                   |
|---------|---------|----|----------|-----------------------------------------------------------------------------------|
| TNFAIP2 | Tnfaip2 | 12 | 111.4089 | tumor necrosis factor, alpha-induced protein 2 [Source:MGI Symbol;Acc:MGI:104960] |
| TREX1   | Trex1   | 9  | 108.887  | three prime repair exonuclease 1 [Source:MGI Symbol;Acc:MGI:1328317]              |
| TRIM14  | Trim14  | 4  | 46.49378 | tripartite motif-containing 14 [Source:MGI Symbol;Acc:MGI:1921985]                |
| UBA2    | Uba2    | 7  | 33.84011 | ubiquitin-like modifier activating enzyme 2 [Source:MGI Symbol;Acc:MGI:1858313]   |
| ZNF706  | Zfp706  | 15 | 36.99727 | zinc finger protein 706 [Source:MGI Symbol;Acc:MGI:1915286]                       |

\* Chr, Chromosome

**Supplement Table S2.** The unique proteins from cell lysate (proteome) that presented only in Ezh2 null macrophages with LPS tolerance

| Pasted   | Symbol   | Chr | Position<br>(Mbp) | Description                                                                                                  |
|----------|----------|-----|-------------------|--------------------------------------------------------------------------------------------------------------|
| NRP2     | Nrp2     | 1   | 62.74244          | neuropilin 2 [Source:MGI Symbol;Acc:MGI:1100492]                                                             |
|          |          |     |                   | v-ral simian leukemia viral oncogene B [Source:MGI Symbol;Acc:MGI:1927244]                                   |
| RALB     | Ralb     | 1   | 119.398           | RAB3 GTPase activating protein subunit 1 [Source:MGI Symbol;Acc:MGI:2445001]                                 |
| RAB3GAP1 | Rab3gap1 | 1   | 127.7965          | N-acetylneuraminate pyruvate lyase [Source:MGI Symbol;Acc:MGI:1921341]                                       |
| NPL      | Npl      | 1   | 153.3788          | serine (or cysteine) peptidase inhibitor, clade C (antithrombin), member 1 [Source:MGI Symbol;Acc:MGI:88095] |
| SERPINC1 | Serpinc1 | 1   | 160.8062          | DDB1 and CUL4 associated factor 8 [Source:MGI Symbol;Acc:MGI:91860]                                          |
| DCAF8    | Dcaf8    | 1   | 171.9757          | nuclear VCP-like [Source:MGI Symbol;Acc:MGI:1914709]                                                         |
| NVL      | Nvl      | 1   | 180.9147          | nudix (nucleoside diphosphate linked moiety X)-type motif 5 [Source:MGI Symbol;Acc:MGI:1858232]              |
| NUDT5    | Nudt5    | 2   | 5.84983           | Ras suppressor protein 1 [Source:MGI Symbol;Acc:MGI:103040]                                                  |
| RSU1     | Rsu1     | 2   | 13.08163          | YME1-like 1 (S. cerevisiae) [Source:MGI Symbol;Acc:MGI:1351651]                                              |
| YME1L1   | Yme1l1   | 2   | 23.04638          | histamine N-methyltransferase [Source:MGI Symbol;Acc:MGI:2153181]                                            |
| HNMT     | Hnmt     | 2   | 23.89292          | mitochondrial carrier 2 [Source:MGI Symbol;Acc:MGI:1929260]                                                  |
| MTCH2    | Mtch2    | 2   | 90.6775           | ER membrane protein complex subunit 4 [Source:MGI Symbol;Acc:MGI:1915282]                                    |
| EMC4     | Emc4     | 2   | 112.1934          | huntingtin interacting protein K [Source:MGI Symbol;Acc:MGI:1914943]                                         |
| HYPK     | Hypk     | 2   | 121.2838          | nitrogen fixation gene 1 (S. cerevisiae) [Source:MGI Symbol;Acc:MGI:1316706]                                 |
| NFS1     | Nfs1     | 2   | 155.9656          | topoisomerase (DNA) I [Source:MGI Symbol;Acc:MGI:98788]                                                      |
| TOP1     | Top1     | 2   | 160.4878          | mitochondrial ribosomal protein S28 [Source:MGI Symbol;Acc:MGI:1913480]                                      |
| MRPS28   | Mrps28   | 3   | 8.867206          | NHL repeat containing 3 [Source:MGI Symbol;Acc:MGI:2444520]                                                  |
| NHLRC3   | Nhlrc3   | 3   | 53.356            | ribosomal protein S27 [Source:MGI Symbol;Acc:MGI:1888676]                                                    |
| RPS27    | Rps27    | 3   | 90.11983          | RNA binding motif protein 8a [Source:MGI Symbol;Acc:MGI:1913129]                                             |
| RBM8A    | Rbm8a    | 3   | 96.53725          | neuroblastoma ras oncogene [Source:MGI Symbol;Acc:MGI:97376]                                                 |
| NRAS     | Nras     | 3   | 102.9656          | pyrophosphatase (inorganic) 2 [Source:MGI Symbol;Acc:MGI:1922026]                                            |
| PPA2     | Ppa2     | 3   | 133.0159          |                                                                                                              |

|          |          |   |          |                                                                                                                                           |
|----------|----------|---|----------|-------------------------------------------------------------------------------------------------------------------------------------------|
| CRYZ     | Cryz     | 3 | 154.3023 | crystallin, zeta [Source:MGI Symbol;Acc:MGI:88527]<br>NADH:ubiquinone oxidoreductase subunit B6 [Source:MGI                               |
| NDUFB6   | Ndufb6   | 4 | 40.27059 | Symbol;Acc:MGI:2684983]                                                                                                                   |
| STX17    | Stx17    | 4 | 48.12492 | syntaxin 17 [Source:MGI Symbol;Acc:MGI:1914977]<br>structural maintenance of chromosomes 2 [Source:MGI                                    |
| SMC2     | Smc2     | 4 | 52.43924 | Symbol;Acc:MGI:106067]<br>cytochrome c oxidase assembly factor 7 [Source:MGI                                                              |
| COA7     | Coa7     | 4 | 108.1853 | Symbol;Acc:MGI:1917143]                                                                                                                   |
| RRAGC    | Rragc    | 4 | 123.8112 | Ras-related GTP binding C [Source:MGI Symbol;Acc:MGI:1858751]<br>aldehyde dehydrogenase 4 family, member A1 [Source:MGI                   |
| ALDH4A1  | Aldh4a1  | 4 | 139.3502 | Symbol;Acc:MGI:2443883]                                                                                                                   |
| FBLIM1   | Fblim1   | 4 | 141.3034 | filamin binding LIM protein 1 [Source:MGI Symbol;Acc:MGI:1921452]<br>DnaJ heat shock protein family (Hsp40) member C16 [Source:MGI        |
| DNAJC16  | Dnajc16  | 4 | 141.4875 | Symbol;Acc:MGI:2442146]<br>ATPase family, AAA domain containing 3A [Source:MGI                                                            |
| ATAD3    | Atad3a   | 4 | 155.8251 | Symbol;Acc:MGI:1919214]                                                                                                                   |
| MLEC     | Mlec     | 5 | 115.281  | malectin [Source:MGI Symbol;Acc:MGI:1924015]                                                                                              |
| DDX54    | Ddx54    | 5 | 120.7508 | DEAD box helicase 54 [Source:MGI Symbol;Acc:MGI:1919240]<br>purinergic receptor P2X, ligand-gated ion channel 4 [Source:MGI               |
| P2RX4    | P2rx4    | 5 | 122.8456 | Symbol;Acc:MGI:1338859]                                                                                                                   |
| TMEM120A | Tmem120a | 5 | 135.7643 | transmembrane protein 120A [Source:MGI Symbol;Acc:MGI:2686991]<br>NADH:ubiquinone oxidoreductase subunit A5 [Source:MGI                   |
| NDUFA5   | Ndufa5   | 6 | 24.51867 | Symbol;Acc:MGI:1915452]                                                                                                                   |
| IRF5     | Irf5     | 6 | 29.52662 | interferon regulatory factor 5 [Source:MGI Symbol;Acc:MGI:1350924]<br>coiled-coil-helix-coiled-coil-helix domain containing 6 [Source:MGI |
| CHCHD6   | Chchd6   | 6 | 89.36013 | Symbol;Acc:MGI:1913348]                                                                                                                   |
| ALOX5    | Alox5    | 6 | 116.387  | arachidonate 5-lipoxygenase [Source:MGI Symbol;Acc:MGI:87999]                                                                             |
| UBE2M    | Ube2m    | 7 | 12.76905 | ubiquitin-conjugating enzyme E2M [Source:MGI Symbol;Acc:MGI:108278]<br>adaptor-related protein complex 2, sigma 1 subunit [Source:MGI     |
| AP2S1    | Ap2s1    | 7 | 16.47234 | Symbol;Acc:MGI:2141861]<br>enoyl coenzyme A hydratase 1, peroxisomal [Source:MGI                                                          |
| ECH1     | Ech1     | 7 | 28.52464 | Symbol;Acc:MGI:1858208]<br>ER membrane protein complex subunit 10 [Source:MGI                                                             |
| EMC10    | Emc10    | 7 | 44.13936 | Symbol;Acc:MGI:1916933]                                                                                                                   |
| AKT1S1   | Akt1s1   | 7 | 44.49842 | AKT1 substrate 1 (proline-rich) [Source:MGI Symbol;Acc:MGI:1914855]<br>small nuclear ribonucleoprotein polypeptide A' [Source:MGI         |
| SNRPA1   | Snrpa1   | 7 | 65.70875 | Symbol;Acc:MGI:1916231]                                                                                                                   |
| THUMPD1  | Thumpd1  | 7 | 119.3143 | THUMP domain containing 1 [Source:MGI Symbol;Acc:MGI:2444479]<br>interferon induced transmembrane protein 3 [Source:MGI                   |
| IFITM3   | Ifitm3   | 7 | 140.5895 | Symbol;Acc:MGI:1913391]                                                                                                                   |
| NAXD     | Naxd     | 8 | 11.54751 | NAD(P)HX dehydratase [Source:MGI Symbol;Acc:MGI:1913353]<br>protein phosphatase 2 (formerly 2A), catalytic subunit, beta isoform          |
| PPP2CB   | Ppp2cb   | 8 | 34.08965 | [Source:MGI Symbol;Acc:MGI:1321161]                                                                                                       |

|         |         |    |          |                                                                                                                    |
|---------|---------|----|----------|--------------------------------------------------------------------------------------------------------------------|
| DCTN6   | Dctn6   | 8  | 34.55757 | dynactin 6 [Source:MGI Symbol;Acc:MGI:1343154]                                                                     |
| SNTB2   | Sntb2   | 8  | 107.6624 | syntrophin, basic 2 [Source:MGI Symbol;Acc:MGI:101771]                                                             |
| NRP1    | Nrp1    | 8  | 129.0851 | neuropilin 1 [Source:MGI Symbol;Acc:MGI:106206]                                                                    |
| DNMT1   | Dnmt1   | 9  | 20.81851 | DNA methyltransferase (cytosine-5) 1 [Source:MGI Symbol;Acc:MGI:94912]                                             |
| ATP5MG  | Atp5l   | 9  | 44.82386 | ATP synthase, H <sup>+</sup> transporting, mitochondrial F0 complex, subunit G [Source:MGI Symbol;Acc:MGI:1351597] |
| ADPGK   | Adpgk   | 9  | 59.19884 | ADP-dependent glucokinase [Source:MGI Symbol;Acc:MGI:1919391]                                                      |
| UACA    | Uaca    | 9  | 60.70182 | uveal autoantigen with coiled-coil domains and ankyrin repeats [Source:MGI Symbol;Acc:MGI:1919815]                 |
| ADAM10  | Adam10  | 9  | 70.58628 | a disintegrin and metallopeptidase domain 10 [Source:MGI Symbol;Acc:MGI:109548]                                    |
| SLC17A5 | Slc17a5 | 9  | 78.44377 | solute carrier family 17 (anion/sugar transporter), member 5 [Source:MGI Symbol;Acc:MGI:1924105]                   |
| MTHFD1L | Mthfd1l | 10 | 3.923118 | methylenetetrahydrofolate dehydrogenase (NADP <sup>+</sup> dependent) 1-like [Source:MGI Symbol;Acc:MGI:1924836]   |
| NUP43   | Nup43   | 10 | 7.543267 | nucleoporin 43 [Source:MGI Symbol;Acc:MGI:1917162]                                                                 |
| ARG1    | Arg1    | 10 | 24.79112 | arginase, liver [Source:MGI Symbol;Acc:MGI:88070]                                                                  |
| ARL1    | Arl1    | 10 | 88.56672 | ADP-ribosylation factor-like 1 [Source:MGI Symbol;Acc:MGI:99436]                                                   |
| BLOC1S1 | Bloc1s1 | 10 | 128.7538 | biogenesis of lysosomal organelles complex-1, subunit 1 [Source:MGI Symbol;Acc:MGI:1195276]                        |
| PNPT1   | Pnpt1   | 11 | 29.08074 | polyribonucleotide nucleotidyltransferase 1 [Source:MGI Symbol;Acc:MGI:1918951]                                    |
| MAP2K3  | Map2k3  | 11 | 60.82286 | mitogen-activated protein kinase kinase 3 [Source:MGI Symbol;Acc:MGI:1346868]                                      |
| PLSCR3  | Plscr3  | 11 | 69.7372  | phospholipid scramblase 3 [Source:MGI Symbol;Acc:MGI:1917560]                                                      |
| NUP88   | Nup88   | 11 | 70.83388 | nucleoporin 88 [Source:MGI Symbol;Acc:MGI:104900]                                                                  |
| CPD     | Cpd     | 11 | 76.66925 | carboxypeptidase D [Source:MGI Symbol;Acc:MGI:107265]                                                              |
| SDF2    | Sdf2    | 11 | 78.13657 | stromal cell derived factor 2 [Source:MGI Symbol;Acc:MGI:108019]                                                   |
| ACSF2   | Acsf2   | 11 | 94.44793 | acyl-CoA synthetase family member 2 [Source:MGI Symbol;Acc:MGI:2388287]                                            |
| FDXR    | Fdxr    | 11 | 115.1589 | ferredoxin reductase [Source:MGI Symbol;Acc:MGI:104724]                                                            |
| SUMO2   | Sumo2   | 11 | 115.4139 | small ubiquitin-like modifier 2 [Source:MGI Symbol;Acc:MGI:2158813]                                                |
| PPM1A   | Ppm1a   | 12 | 72.80423 | protein phosphatase 1A, magnesium dependent, alpha isoform [Source:MGI Symbol;Acc:MGI:99878]                       |
| HSPA2   | Hspa2   | 12 | 76.45095 | heat shock protein 2 [Source:MGI Symbol;Acc:MGI:96243]                                                             |
| ALDH6A1 | Aldh6a1 | 12 | 84.47749 | aldehyde dehydrogenase family 6, subfamily A1 [Source:MGI Symbol;Acc:MGI:1915077]                                  |
| GLRX5   | Glr5    | 12 | 104.9989 | glutaredoxin 5 [Source:MGI Symbol;Acc:MGI:1920296]                                                                 |
| NDUFS4  | Ndufs4  | 13 | 114.4243 | NADH:ubiquinone oxidoreductase core subunit S4 [Source:MGI Symbol;Acc:MGI:1343135]                                 |
| RPL15   | Rpl15   | 14 | 4.198305 | ribosomal protein L15 [Source:MGI Symbol;Acc:MGI:1913730]                                                          |
| GNG2    | Gng2    | 14 | 19.92263 | guanine nucleotide binding protein (G protein), gamma 2 [Source:MGI Symbol;Acc:MGI:102705]                         |

---

|         |         |    |          |                                                                                                                                                        |
|---------|---------|----|----------|--------------------------------------------------------------------------------------------------------------------------------------------------------|
| CTSG    | Ctsg    | 14 | 56.33734 | cathepsin G [Source:MGI Symbol;Acc:MGI:88563]                                                                                                          |
| ZNF622  | Zfp622  | 15 | 25.98445 | zinc finger protein 622 [Source:MGI Symbol;Acc:MGI:1289282]<br>reactive intermediate imine deaminase A homolog [Source:MGI<br>Symbol;Acc:MGI:1095401]  |
| RIDA    | Rida    | 15 | 34.48417 |                                                                                                                                                        |
| ZNF706  | Zfp706  | 15 | 36.99727 | zinc finger protein 706 [Source:MGI Symbol;Acc:MGI:1915286]<br>NmrA-like family domain containing 1 [Source:MGI<br>Symbol;Acc:MGI:1915074]             |
| NMRAL1  | Nmral1  | 16 | 4.527923 |                                                                                                                                                        |
| LRCH3   | Lrch3   | 16 | 32.73447 | leucine-rich repeats and calponin homology (CH) domain containing 3<br>[Source:MGI Symbol;Acc:MGI:1917394]                                             |
| MRPL39  | Mrpl39  | 16 | 84.51446 | mitochondrial ribosomal protein L39 [Source:MGI<br>Symbol;Acc:MGI:1351620]                                                                             |
| CUTA    | Cuta    | 17 | 27.15279 | cutA divalent cation tolerance homolog [Source:MGI<br>Symbol;Acc:MGI:1914925]                                                                          |
| NDUFA7  | Ndufa7  | 17 | 34.04355 | NADH:ubiquinone oxidoreductase subunit A7 [Source:MGI<br>Symbol;Acc:MGI:1913666]                                                                       |
| HSD17B8 | H2-Ke6  | 17 | 34.24501 | H2-K region expressed gene 6 [Source:MGI Symbol;Acc:MGI:95911]<br>2'-deoxynucleoside 5'-phosphate N-hydrolase 1 [Source:MGI<br>Symbol;Acc:MGI:3039376] |
| DNPH1   | Dnph1   | 17 | 46.80764 |                                                                                                                                                        |
| MRPL2   | Mrpl2   | 17 | 46.95716 | mitochondrial ribosomal protein L2 [Source:MGI<br>Symbol;Acc:MGI:1351622]                                                                              |
| HEATR5B | Heatr5b | 17 | 79.06033 | HEAT repeat containing 5B [Source:MGI Symbol;Acc:MGI:2444098]                                                                                          |
| DMXL1   | Dmxl1   | 18 | 49.96574 | Dmx-like 1 [Source:MGI Symbol;Acc:MGI:2443926]<br>thioredoxin-related transmembrane protein 3 [Source:MGI<br>Symbol;Acc:MGI:2442418]                   |
| TMX3    | Tmx3    | 18 | 90.52828 |                                                                                                                                                        |
| NDUFV1  | Ndufv1  | 19 | 4.057384 | NADH:ubiquinone oxidoreductase core subunit V1 [Source:MGI<br>Symbol;Acc:MGI:107851]                                                                   |
| CCS     | Ccs     | 19 | 4.875394 | copper chaperone for superoxide dismutase [Source:MGI<br>Symbol;Acc:MGI:1333783]                                                                       |
| CYCS    | Gm10053 | 19 | 24.85305 | predicted gene 10053 [Source:MGI Symbol;Acc:MGI:3704493]                                                                                               |
| AK3     | Ak3     | 19 | 28.99823 | adenylate kinase 3 [Source:MGI Symbol;Acc:MGI:1860835]<br>RAP2C, member of RAS oncogene family [Source:MGI<br>Symbol;Acc:MGI:1919315]                  |
| RAP2C   | Rap2c   |    | 50.09279 |                                                                                                                                                        |
| IDH3G   | Idh3g   |    | 72.82257 | isocitrate dehydrogenase 3 (NAD+), gamma [Source:MGI<br>Symbol;Acc:MGI:1099463]                                                                        |
| RPS6KA3 | Rps6ka3 |    | 157.9933 | ribosomal protein S6 kinase polypeptide 3 [Source:MGI<br>Symbol;Acc:MGI:104557]                                                                        |

---

\*Chr, Chromosome

**Supplement Table S3.** The unique proteins from the supernatant (secretome) that presented only in LPS-activated Ezh2 null macrophages

| Pasted   | Symbol   | Position |          | Description                                                                                                                         |
|----------|----------|----------|----------|-------------------------------------------------------------------------------------------------------------------------------------|
|          |          | Chr*     | (Mbp)    |                                                                                                                                     |
| HSPD1    | Hspd1    | 1        | 55.11699 | heat shock protein 1 (chaperonin) [Source:MGI Symbol;Acc:MGI:96242]                                                                 |
| IDH1     | Idh1     | 1        | 65.19778 | isocitrate dehydrogenase 1 (NADP+), soluble [Source:MGI Symbol;Acc:MGI:96413]                                                       |
| PRDX6    | Prdx6    | 1        | 161.0677 | peroxiredoxin 6 [Source:MGI Symbol;Acc:MGI:894320]                                                                                  |
| VIM      | Vim      | 2        | 13.57874 | vimentin [Source:MGI Symbol;Acc:MGI:98932]<br>UDP-N-acteylglucosamine pyrophosphorylase 1-like 1 [Source:MGI                        |
| UAP1L1   | Uap1l1   | 2        | 25.2499  | Symbol;Acc:MGI:2443318]                                                                                                             |
| GSN      | Gsn      | 2        | 35.14639 | gelsolin [Source:MGI Symbol;Acc:MGI:95851]                                                                                          |
| CST3     | Cst3     | 2        | 148.7136 | cystatin C [Source:MGI Symbol;Acc:MGI:102519]<br>tyrosine 3-monooxygenase/tryptophan 5-monooxygenase activation protein, beta       |
| YWHAB    | Ywhab    | 2        | 163.8369 | polypeptide [Source:MGI Symbol;Acc:MGI:1891917]                                                                                     |
| PLTP     | Pltp     | 2        | 164.6814 | phospholipid transfer protein [Source:MGI Symbol;Acc:MGI:103151]                                                                    |
| FABP5    | Fabp5    | 3        | 10.07761 | fatty acid binding protein 5, epidermal [Source:MGI Symbol;Acc:MGI:101790]                                                          |
| LMNA     | Lmna     | 3        | 88.38745 | lamin A [Source:MGI Symbol;Acc:MGI:96794]                                                                                           |
| S100A4   | S100a4   | 3        | 90.51108 | S100 calcium binding protein A4 [Source:MGI Symbol;Acc:MGI:1330282]                                                                 |
| S100A6   | S100a6   | 3        | 90.52019 | S100 calcium binding protein A6 (calcyclin) [Source:MGI Symbol;Acc:MGI:1339467]                                                     |
| CTSS     | Ctss     | 3        | 95.4341  | cathepsin S [Source:MGI Symbol;Acc:MGI:107341]<br>capping protein (actin filament) muscle Z-line, alpha 1 [Source:MGI               |
| CAPZA1   | Capza1   | 3        | 104.7301 | Symbol;Acc:MGI:106227]<br>aldo-keto reductase family 1, member A1 (aldehyde reductase) [Source:MGI                                  |
| AKR1A1   | Akr1a1   | 4        | 116.4937 | Symbol;Acc:MGI:1929955]                                                                                                             |
| PRDX1    | Prdx1    | 4        | 116.5427 | peroxiredoxin 1 [Source:MGI Symbol;Acc:MGI:99523]                                                                                   |
| MARCKSL1 | Marcksl1 | 4        | 129.4074 | MARCKS-like 1 [Source:MGI Symbol;Acc:MGI:97143]<br>SH3 domain binding glutamic acid-rich protein-like 3 [Source:MGI                 |
| SH3BGRL3 | Sh3bgrl3 | 4        | 133.8547 | Symbol;Acc:MGI:1920973]<br>complement component 1, q subcomponent, beta polypeptide [Source:MGI                                     |
| C1QB     | C1qb     | 4        | 136.6074 | Symbol;Acc:MGI:88224]<br>complement component 1, q subcomponent, C chain [Source:MGI                                                |
| C1QC     | C1qc     | 4        | 136.6171 | Symbol;Acc:MGI:88225]<br>complement component 1, q subcomponent, alpha polypeptide [Source:MGI                                      |
| C1QA     | C1qa     | 4        | 136.6232 | Symbol;Acc:MGI:88223]                                                                                                               |
| ENO1     | Eno1     | 4        | 150.3212 | enolase 1, alpha non-neuron [Source:MGI Symbol;Acc:MGI:95393]<br>Parkinson disease (autosomal recessive, early onset) 7 [Source:MGI |
| PARK7    | Park7    | 4        | 150.9816 | Symbol;Acc:MGI:2135637]                                                                                                             |
| WDR1     | Wdr1     | 5        | 38.68416 | WD repeat domain 1 [Source:MGI Symbol;Acc:MGI:1337100]                                                                              |
| CXCL2    | Cxcl2    | 5        | 91.05173 | chemokine (C-X-C motif) ligand 2 [Source:MGI Symbol;Acc:MGI:1340094]                                                                |
| CXCL10   | Cxcl10   | 5        | 92.4945  | chemokine (C-X-C motif) ligand 10 [Source:MGI Symbol;Acc:MGI:1352450]                                                               |
| RAN      | Ran      | 5        | 129.0971 | RAN, member RAS oncogene family [Source:MGI Symbol;Acc:MGI:1333112]                                                                 |
| GUSB     | Gusb     | 5        | 130.0179 | glucuronidase, beta [Source:MGI Symbol;Acc:MGI:95872]                                                                               |

|          |          |    |          |                                                                                |
|----------|----------|----|----------|--------------------------------------------------------------------------------|
|          |          |    |          | malate dehydrogenase 2, NAD (mitochondrial) [Source:MGI                        |
| MDH2     | Mdh2     | 5  | 135.8073 | Symbol;Acc:MGI:97050]                                                          |
| ACTB     | Actb     | 5  | 142.8889 | actin, beta [Source:MGI Symbol;Acc:MGI:87904]                                  |
| GPNUMB   | Gpnmb    | 6  | 49.01348 | glycoprotein (transmembrane) nmb [Source:MGI Symbol;Acc:MGI:1934765]           |
|          |          |    |          | capping protein (actin filament), gelsolin-like [Source:MGI                    |
| CAPG     | Capg     | 6  | 72.52137 | Symbol;Acc:MGI:1098259]                                                        |
| TPI1     | Tpi1     | 6  | 124.7875 | triosephosphate isomerase 1 [Source:MGI Symbol;Acc:MGI:98797]                  |
| GAPDH    | Gapdh    | 6  | 125.1387 | glyceraldehyde-3-phosphate dehydrogenase [Source:MGI Symbol;Acc:MGI:95640]     |
| GPI      | Gpi1     | 7  | 33.90076 | glucose-6-phosphate isomerase 1 [Source:MGI Symbol;Acc:MGI:95797]              |
| NUCB1    | Nucb1    | 7  | 45.13988 | nucleobindin 1 [Source:MGI Symbol;Acc:MGI:97388]                               |
| LDHA     | Ldha     | 7  | 46.4909  | lactate dehydrogenase A [Source:MGI Symbol;Acc:MGI:96759]                      |
| ALDOA    | Aldoa    | 7  | 126.3944 | aldolase A, fructose-bisphosphate [Source:MGI Symbol;Acc:MGI:87994]            |
| TALDO1   | Taldo1   | 7  | 140.9721 | transaldolase 1 [Source:MGI Symbol;Acc:MGI:1274789]                            |
| CTSD     | Ctsd     | 7  | 141.9296 | cathepsin D [Source:MGI Symbol;Acc:MGI:88562]                                  |
| LAMP1    | Lamp1    | 8  | 13.20916 | lysosomal-associated membrane protein 1 [Source:MGI Symbol;Acc:MGI:96745]      |
| LPL      | Lpl      | 8  | 69.33314 | lipoprotein lipase [Source:MGI Symbol;Acc:MGI:96820]                           |
|          |          |    |          | ATPase, H <sup>+</sup> transporting, lysosomal V1 subunit B2 [Source:MGI       |
| ATP6V1B2 | Atp6v1b2 | 8  | 69.5413  | Symbol;Acc:MGI:109618]                                                         |
| PRDX2    | Prdx2    | 8  | 85.69622 | peroxiredoxin 2 [Source:MGI Symbol;Acc:MGI:109486]                             |
| COTL1    | Cotl1    | 8  | 120.536  | coactosin-like 1 (Dictyostelium) [Source:MGI Symbol;Acc:MGI:1919292]           |
| HSPA8    | Hspa8    | 9  | 40.71228 | heat shock protein 8 [Source:MGI Symbol;Acc:MGI:105384]                        |
| H2AX     | H2ax     | 9  | 44.24599 | H2A.X variant histone [Source:MGI Symbol;Acc:MGI:102688]                       |
| PKM      | Pkm      | 9  | 59.56365 | pyruvate kinase, muscle [Source:MGI Symbol;Acc:MGI:97591]                      |
|          |          |    |          | eukaryotic translation elongation factor 1 alpha 1 [Source:MGI                 |
| EEF1A1   | Eef1a1   | 9  | 78.38573 | Symbol;Acc:MGI:1096881]                                                        |
| TF       | Trf      | 9  | 103.0812 | transferrin [Source:MGI Symbol;Acc:MGI:98821]                                  |
| PSAP     | Psap     | 10 | 60.11345 | prosaposin [Source:MGI Symbol;Acc:MGI:97783]                                   |
| CSTB     | Cstb     | 10 | 78.2615  | cystatin B [Source:MGI Symbol;Acc:MGI:109514]                                  |
| EEF2     | Eef2     | 10 | 81.01247 | eukaryotic translation elongation factor 2 [Source:MGI Symbol;Acc:MGI:95288]   |
| UBE2N    | Ube2n    | 10 | 95.35101 | ubiquitin-conjugating enzyme E2N [Source:MGI Symbol;Acc:MGI:1934835]           |
| LYZ2     | Lyz2     | 10 | 117.1132 | lysozyme 2 [Source:MGI Symbol;Acc:MGI:96897]                                   |
| GNS      | Gns      | 10 | 121.201  | glucosamine (N-acetyl)-6-sulfatase [Source:MGI Symbol;Acc:MGI:1922862]         |
|          |          |    |          | low density lipoprotein receptor-related protein 1 [Source:MGI                 |
| LRP1     | Lrp1     | 10 | 127.374  | Symbol;Acc:MGI:96828]                                                          |
| PPIA     | Ppia     | 11 | 6.365443 | peptidylprolyl isomerase A [Source:MGI Symbol;Acc:MGI:97749]                   |
| RPS27A   | Rps27a   | 11 | 29.49585 | ribosomal protein S27A [Source:MGI Symbol;Acc:MGI:1925544]                     |
| IL12B    | Il12b    | 11 | 44.29089 | interleukin 12b [Source:MGI Symbol;Acc:MGI:96540]                              |
| PFN1     | Pfn1     | 11 | 70.54268 | profilin 1 [Source:MGI Symbol;Acc:MGI:97549]                                   |
| PITPNA   | Pitpna   | 11 | 75.47892 | phosphatidylinositol transfer protein, alpha [Source:MGI Symbol;Acc:MGI:99887] |
| NME1     | Nme1     | 11 | 93.84781 | NME/NM23 nucleoside diphosphate kinase 1 [Source:MGI Symbol;Acc:MGI:97355]     |
| VAT1     | Vat1     | 11 | 101.3496 | vesicle amine transport 1 [Source:MGI Symbol;Acc:MGI:1349450]                  |
| GRN      | Grn      | 11 | 102.3211 | granulin [Source:MGI Symbol;Acc:MGI:95832]                                     |

|           |           |    |          |                                                                                 |
|-----------|-----------|----|----------|---------------------------------------------------------------------------------|
|           |           |    |          | lectin, galactoside-binding, soluble, 3 binding protein [Source:MGI             |
| LGALS3BP  | Lgals3bp  | 11 | 118.2836 | Symbol;Acc:MGI:99554]                                                           |
| ARHGDIA   | Arhgdia   | 11 | 120.4689 | Rho GDP dissociation inhibitor (GDI) alpha [Source:MGI Symbol;Acc:MGI:2178103]  |
| DLD       | Dld       | 12 | 31.38128 | dihydrolipoamide dehydrogenase [Source:MGI Symbol;Acc:MGI:107450]               |
| RAB15     | Rab15     | 12 | 76.84473 | RAB15, member RAS oncogene family [Source:MGI Symbol;Acc:MGI:1916865]           |
| NPC2      | Npc2      | 12 | 84.80134 | NPC intracellular cholesterol transporter 2 [Source:MGI Symbol;Acc:MGI:1915213] |
|           |           |    |          | serine (or cysteine) peptidase inhibitor, clade A, member 1F [Source:MGI        |
| SERPINA1F | Serpina1f | 12 | 103.6543 | Symbol;Acc:MGI:1915598]                                                         |
| CKB       | Ckb       | 12 | 111.6358 | creatine kinase, brain [Source:MGI Symbol;Acc:MGI:88407]                        |
| H1-3      | H1f3      | 13 | 23.73744 | H1.3 linker histone, cluster member [Source:MGI Symbol;Acc:MGI:107502]          |
| H2BC1     | H2bc1     | 13 | 24.11776 | H2B clustered histone 1 [Source:MGI Symbol;Acc:MGI:2448375]                     |
| CTSL      | Ctsl      | 13 | 64.50715 | cathepsin L [Source:MGI Symbol;Acc:MGI:88564]                                   |
| TKT       | Tkt       | 14 | 30.27032 | transketolase [Source:MGI Symbol;Acc:MGI:105992]                                |
| LGALS3    | Lgals3    | 14 | 47.60521 | lectin, galactose binding, soluble 3 [Source:MGI Symbol;Acc:MGI:96778]          |
| PNP       | Pnp       | 14 | 51.16854 | purine-nucleoside phosphorylase [Source:MGI Symbol;Acc:MGI:97365]               |
| CTSB      | Ctsb      | 14 | 63.35991 | cathepsin B [Source:MGI Symbol;Acc:MGI:88561]                                   |
| PTK2B     | Ptk2b     | 14 | 66.39071 | PTK2 protein tyrosine kinase 2 beta [Source:MGI Symbol;Acc:MGI:104908]          |
| DPYSL2    | Dpysl2    | 14 | 67.04031 | dihydropyrimidinase-like 2 [Source:MGI Symbol;Acc:MGI:1349763]                  |
| LCP1      | Lcp1      | 14 | 75.36854 | lymphocyte cytosolic protein 1 [Source:MGI Symbol;Acc:MGI:104808]               |
| TPT1      | Tpt1      | 14 | 76.08253 | tumor protein, translationally-controlled 1 [Source:MGI Symbol;Acc:MGI:104890]  |
|           |           |    |          | brain abundant, membrane attached signal protein 1 [Source:MGI                  |
| BASP1     | Basp1     | 15 | 25.36336 | Symbol;Acc:MGI:1917600]                                                         |
| LGALS1    | Lgals1    | 15 | 78.81093 | lectin, galactose binding, soluble 1 [Source:MGI Symbol;Acc:MGI:96777]          |
| ARF3      | Arf3      | 15 | 98.63452 | ADP-ribosylation factor 3 [Source:MGI Symbol;Acc:MGI:99432]                     |
| TUBA1B    | Tuba1b    | 15 | 98.82931 | tubulin, alpha 1B [Source:MGI Symbol;Acc:MGI:107804]                            |
| KRT76     | Krt76     | 15 | 101.7928 | keratin 76 [Source:MGI Symbol;Acc:MGI:1924305]                                  |
| AHSG      | Ahsg      | 16 | 22.71003 | alpha-2-HS-glycoprotein [Source:MGI Symbol;Acc:MGI:107189]                      |
| SOD1      | Sod1      | 16 | 90.01764 | superoxide dismutase 1, soluble [Source:MGI Symbol;Acc:MGI:98351]               |
| SOD2      | Sod2      | 17 | 13.22573 | superoxide dismutase 2, mitochondrial [Source:MGI Symbol;Acc:MGI:98352]         |
| TNF       | Tnf       | 17 | 35.41836 | tumor necrosis factor [Source:MGI Symbol;Acc:MGI:104798]                        |
| CALM2     | Calm2     | 17 | 87.74084 | calmodulin 2 [Source:MGI Symbol;Acc:MGI:103250]                                 |
| CSF1R     | Csf1r     | 18 | 61.23367 | colony stimulating factor 1 receptor [Source:MGI Symbol;Acc:MGI:1339758]        |
|           |           |    |          | CNDP dipeptidase 2 (metallopeptidase M20 family) [Source:MGI                    |
| CNDP2     | Cndp2     | 18 | 84.68559 | Symbol;Acc:MGI:1913304]                                                         |
| CFL1      | Cfl1      | 19 | 5.540483 | cofilin 1, non-muscle [Source:MGI Symbol;Acc:MGI:101757]                        |
| PRDX5     | Prdx5     | 19 | 6.884065 | peroxiredoxin 5 [Source:MGI Symbol;Acc:MGI:1859821]                             |
| PGAM1     | Pgam1     | 19 | 41.90036 | phosphoglycerate mutase 1 [Source:MGI Symbol;Acc:MGI:97552]                     |
| LAMP2     | Lamp2     |    | 37.49023 | lysosomal-associated membrane protein 2 [Source:MGI Symbol;Acc:MGI:96748]       |
| FLNA      | Flna      |    | 73.26707 | filamin, alpha [Source:MGI Symbol;Acc:MGI:95556]                                |
| G6PDX     | G6pdx     |    | 73.45309 | glucose-6-phosphate dehydrogenase X-linked [Source:MGI Symbol;Acc:MGI:105979]   |
| MSN       | Msn       |    | 95.13965 | moesin [Source:MGI Symbol;Acc:MGI:97167]                                        |
| PGK1      | Pgk1      |    | 105.2307 | phosphoglycerate kinase 1 [Source:MGI Symbol;Acc:MGI:97555]                     |
| TMSB4X    | Tmsb4x    |    | 165.9901 | thymosin, beta 4, X chromosome [Source:MGI Symbol;Acc:MGI:99510]                |



---

\*Chr, Chromosome

**Supplement Table S4.** The unique proteins from the supernatant (secretome) that presented only in Ezh2 null macrophages with LPS tolerance

---

| Pasted   | Symbol   | Position |          | Description                                                                  |
|----------|----------|----------|----------|------------------------------------------------------------------------------|
|          |          | Chr*     | (Mbp)    |                                                                              |
|          |          |          |          | tyrosine 3-monooxygenase/tryptophan 5-monooxygenase activation protein, beta |
| YWHAB    | Ywhab    | 2        | 163.8369 | polypeptide [Source:MGI Symbol;Acc:MGI:1891917]                              |
| LMNA     | Lmna     | 3        | 88.38745 | lamin A [Source:MGI Symbol;Acc:MGI:96794]                                    |
| MARCKSL1 | Marcksl1 | 4        | 129.4074 | MARCKS-like 1 [Source:MGI Symbol;Acc:MGI:97143]                              |
| LPL      | Lpl      | 8        | 69.33314 | lipoprotein lipase [Source:MGI Symbol;Acc:MGI:96820]                         |
| RPS27A   | Rps27a   | 11       | 29.49585 | ribosomal protein S27A [Source:MGI Symbol;Acc:MGI:1925544]                   |
| PTK2B    | Ptk2b    | 14       | 66.39071 | PTK2 protein tyrosine kinase 2 beta [Source:MGI Symbol;Acc:MGI:104908]       |
| AHSG     | Ahsg     | 16       | 22.71003 | alpha-2-HS-glycoprotein [Source:MGI Symbol;Acc:MGI:107189]                   |
| CALM2    | Calm2    | 17       | 87.74084 | calmodulin 2 [Source:MGI Symbol;Acc:MGI:103250]                              |
| CFL1     | Cfl1     | 19       | 5.540483 | cofilin 1, non-muscle [Source:MGI Symbol;Acc:MGI:101757]                     |
| LAMP2    | Lamp2    |          | 37.49023 | lysosomal-associated membrane protein 2 [Source:MGI Symbol;Acc:MGI:96748]    |

---

\* Chr, Chromosome
